# Supplementary material
Source: PubMed Central journal article supplement (PMC7137781)

## **SUPPORTING INFORMATION**

**Engineering the PduT shell protein to modify the permeability of the 1,2-propanediol microcompartment of *Salmonella*.**

**Chiranjit Chowdhury<sup>1</sup>, Thomas A Bobik<sup>1\*</sup>**

<sup>1</sup> Roy J. Carver Department of Biochemistry, Biophysics and Molecular Biology, Iowa State University, Ames, IA, 50011 USA

\*To whom correspondence should be addressed: Thomas A. Bobik, Iowa State University, Roy J. Carver Department of Biochemistry, Biophysics and Molecular Biology, 2152 Molecular Biology Building, Ames, IA, USA 50011. Tel: (515) 294-8247; Fax: (515) 294-0453; E-mail: bobik@iastate.edu

**Supplementary Table S1. Bacterial Strains used in this study**

| <b>Strains</b> | <b>Genotype/Variant</b>                                              | <b>Source</b>  |
|----------------|----------------------------------------------------------------------|----------------|
| WT             | <i>Salmonella enterica</i> serovar Typhimurium strain LT2            | Lab collection |
| BE293          | LT2/pKD46                                                            | Lab collection |
| BE464          | LT2, $\Delta pduA::frt$                                              | Lab collection |
| BE885          | LT2, $\Delta pduT::frt$                                              | This study     |
| BE1621         | <i>E. coli</i> 10 beta/ pET41a <sup>+</sup> -PBlaP3- <i>sacB-cat</i> | Lab collection |
| BE97           | <i>E. coli</i> BW25141/pKD4                                          | Lab collection |
| BE201          | LT2/pCP20                                                            | Lab collection |
| BE2377         | LT2, PduA-S40L                                                       | This Study     |
| BE2384         | LT2, PduT-C38S                                                       | This Study     |
| BE2389         | LT2, PduA-S40L / $\Delta pduT::frt$                                  | This Study     |
| BE2390         | LT2, PduA-S40L / PduT-C38S                                           | This Study     |
| BE2391         | LT2, PduT-C38I                                                       | This Study     |
| BE2392         | LT2, PduA-S40L / PduT-C38I                                           | This Study     |
| BE2393         | LT2, PduT-C38W                                                       | This Study     |
| BE2394         | LT2, PduA-S40L / PduT-C38W                                           | This Study     |
| BE2395         | LT2, PduT-C38A                                                       | This study     |
| BE2396         | LT2, PduA-S40L / PduT-C38A                                           | This study     |
| BE2225         | LT2, $\Delta pduQ::kan$                                              | Lab collection |
| BE903          | LT2, $\Delta pduQ::frt$                                              | Lab collection |
| BE2397         | LT2, $\Delta pduQ::frt$ / PduT-C38S                                  | This study     |
| BE2398         | LT2, $\Delta pduQ::frt$ / PduT-C38I                                  | This study     |
| BE2399         | LT2, $\Delta pduQ::frt$ / PduT-C38A                                  | This study     |
| BE2547         | LT2, $\Delta pduQ::frt$ / PduT-C38W                                  | This study     |
| BE2568         | LT2, $\Delta pduQ::kan$ / $\Delta pduT::frt$                         | This study     |

**Supplementary Table S2. Growth of *Salmonella* PduT variants on 1,2-PD minimal medium**

| Strains           | Doubling time (h) |
|-------------------|-------------------|
| WT                | 16.4 ± 1.1*       |
| PduT-C38S         | 16.7 ± 0.5        |
| PduT-C38A         | 17.1 ± 0.6        |
| PduT-C38I         | 17.4 ± 0.6        |
| PduT-C38W         | 17.9 ± 0.8        |
| <i>ΔpduT::frt</i> | 17.8 ± 1.1        |

\*Growth assays were performed on 1,2-PD minimal medium with limiting B<sub>12</sub> (25 nM).

Doubling times were calculated from at least three biological replicates. The error estimate shown is one standard deviation. The growth rates of the mutants are not significantly different from wild type (WT) as determined by two-tailed student's *t*-test.

**Supplementary Table S3. Diol dehydratase activities of MCPs purified from *pduT* mutants**

| MCPs from Pdu mutants | Specific Activity<br>( $\mu\text{mol /min/mg}$ ) |
|-----------------------|--------------------------------------------------|
| WT                    | $27.8 \pm 1.2^*$                                 |
| PduT-C38S             | $28.2 \pm 0.9$                                   |
| PduT-C38A             | $27.2 \pm 0.8$                                   |
| PduT-C38I             | $26.5 \pm 0.7$                                   |
| PduT-C38W             | $24.9 \pm 0.6$                                   |
| $\Delta pduT::frt$    | $26.8 \pm 0.6$                                   |

\*Enzyme activities are based on at least three replicates. The error estimate shown is one standard deviation. The diol dehydratase activities of the mutants are not significantly different from wild type (WT) as determined by two-tailed student's *t*-test.

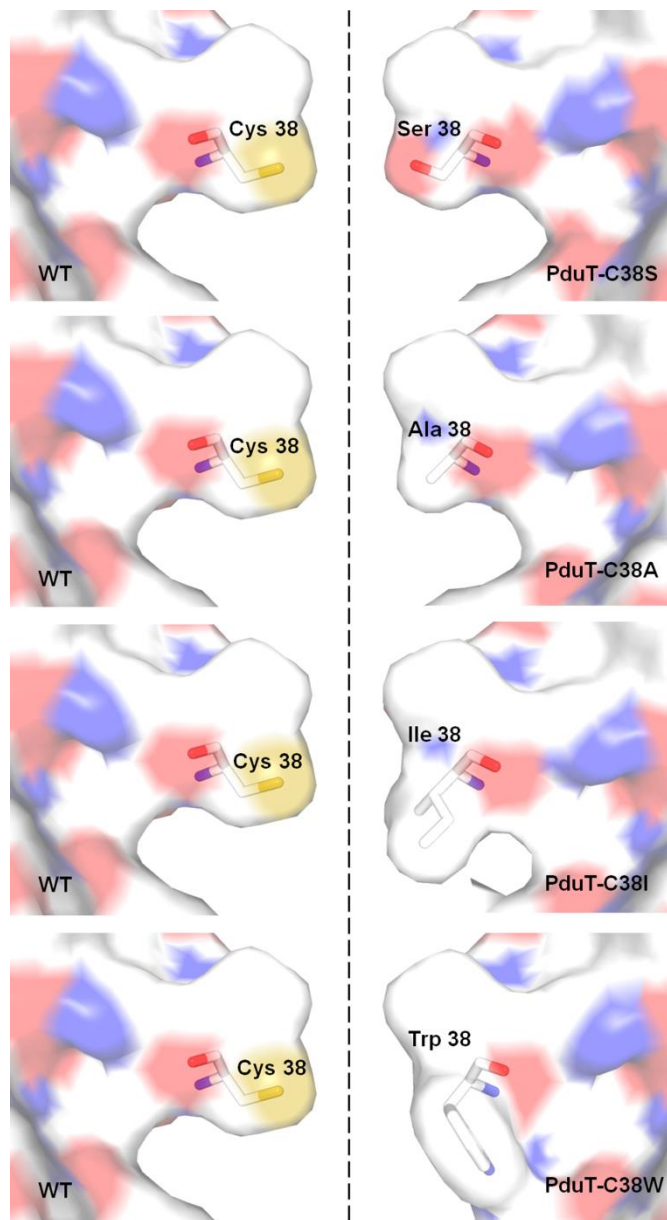

**Supplementary Figure S1: Effects of PduT position 38 mutations on the PduT pore.** The images show a side view through the point of constriction of PduT trimer. Atoms are colored by type - carbon: gray (non-polar), sulfur: yellow (less-polar), oxygen: red (polar), nitrogen: blue (polar). A change in Cys38 to Ser increases polarity at the pore region whereas changes to Ile and Trp decrease polarity.

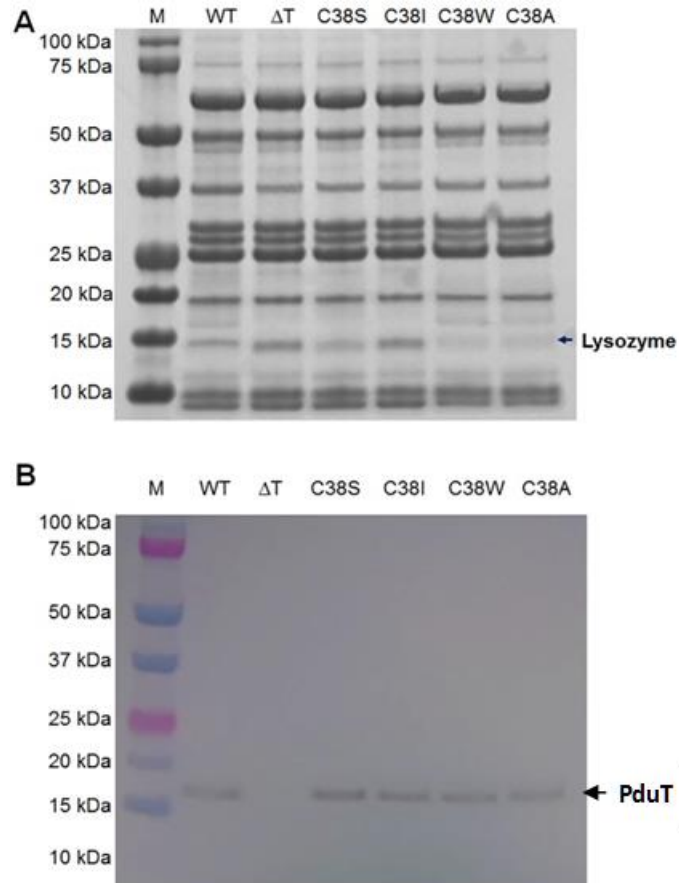

**Supplementary Figure S2: SDS-PAGE and Western Blot analyses of the MCPs isolated from of wild-type (WT) and mutants used in this study.** SDS PAGE (A) and Western Blot (B) analyses demonstrated proper recruitment and incorporation of the PduT mutants into the MCP shell.

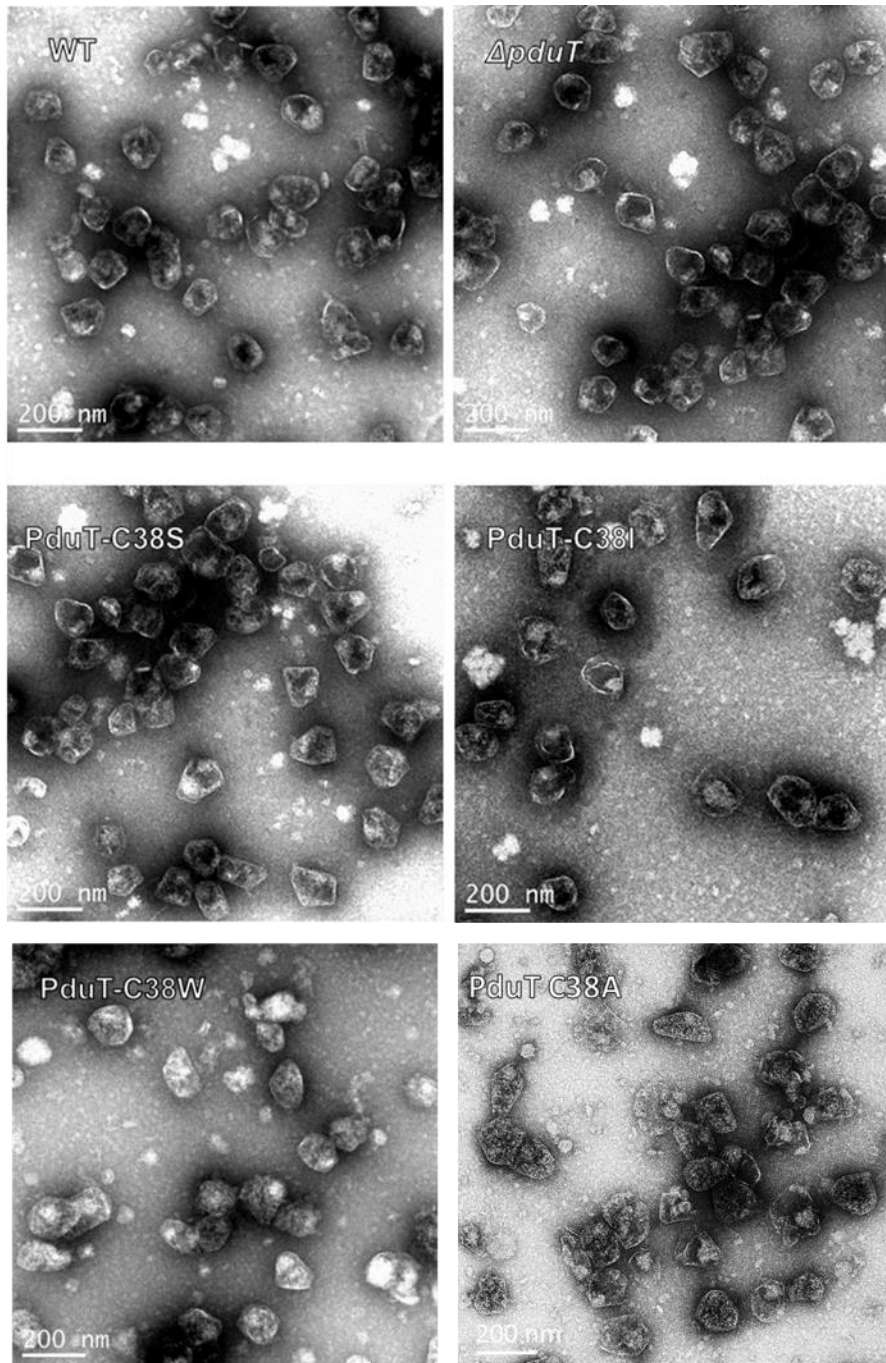

**Supplementary Figure S3: Transmission electron micrographs of purified MCPs from wild-type, *ΔpduT* and PduT mutants.** WT is wild-type *Salmonella enterica* serovar typhimurium LT2. There were no apparent morphological changes in the mutant MCPs compared to wild-type.

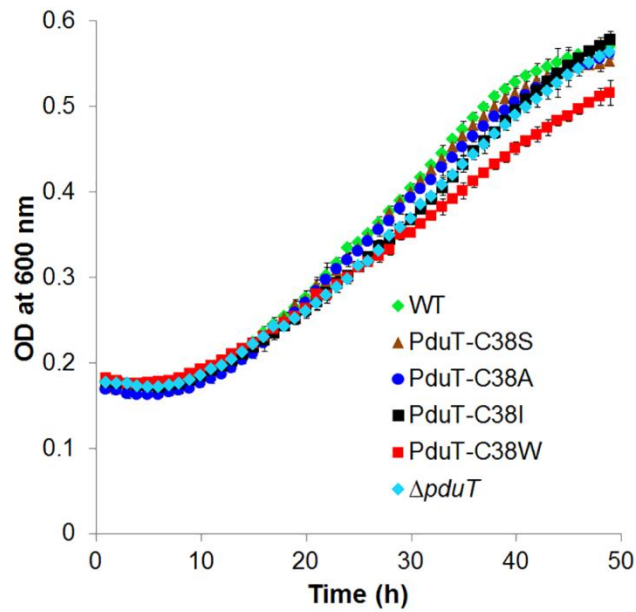

**Supplementary Figure S4: Growth of wild-type and PduT mutants on 1,2-propanediol minimal medium at limiting B<sub>12</sub> (25 nM).** WT= *Salmonella enterica* serovar Typhimurium LT2. Growth assays were performed three times with similar results in microplate reader. Error bars represent one standard deviation from three measurements.



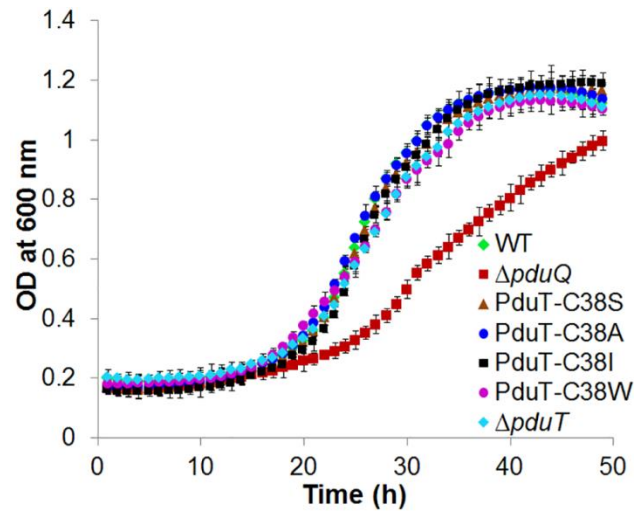

**Supplementary Figure S5: Growth of wild-type and selected PduT mutants on 1,2-propanediol.** WT= *Salmonella enterica* serovar Typhimurium LT2. Growth assays were performed three or more times with similar results in microplate reader. Error bars represent one standard deviation from three measurements.

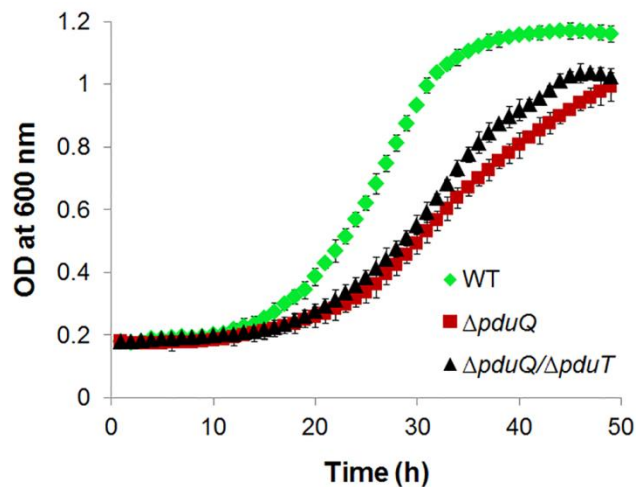

**Supplementary Figure S6: Growth of wild-type,  $\Delta pduQ$  and  $\Delta pduQ$ -  $\Delta pduT$  double mutants on 1,2-propanediol at saturating B<sub>12</sub> (100 nM). WT= *Salmonella enterica* serovar**

Typhimurium LT2. A  $\Delta pduQ$  mutant grows slowly due to impaired recycling of NAD/H inside the MCP lumen. A  $\Delta pduT$  mutant does not correct slower growth phenotype of  $\Delta pduQ$  significantly. Growth assays were performed three or more times with similar results in microplate reader. Error bars represent one standard deviation from three measurements.

**Supplementary Figure S7: Transmission electron micrographs of purified MCPs from wild-type, and key double mutants.** WT is wild-type *Salmonella enterica* serovar typhimurium LT2. There were no apparent morphological changes in the mutant MCPs compared to wild-type.

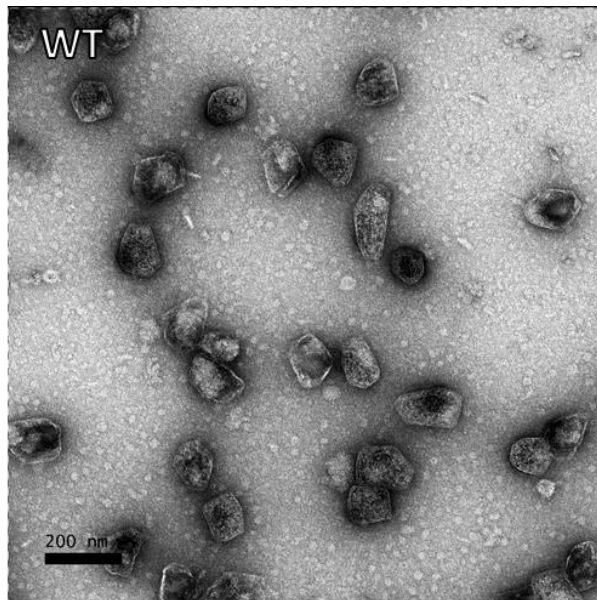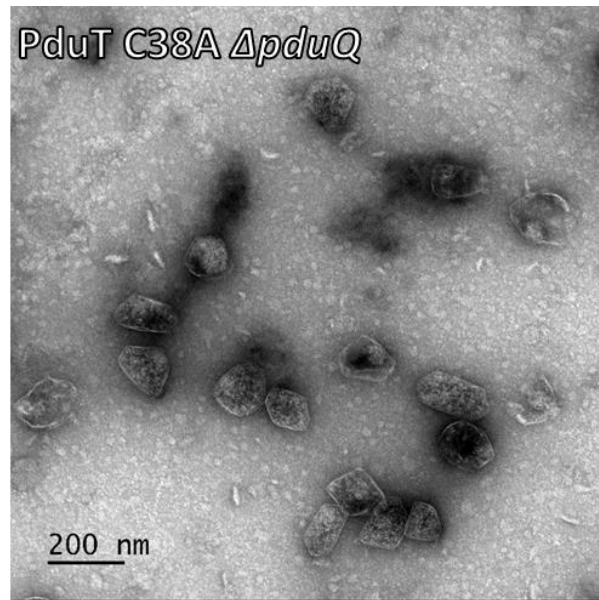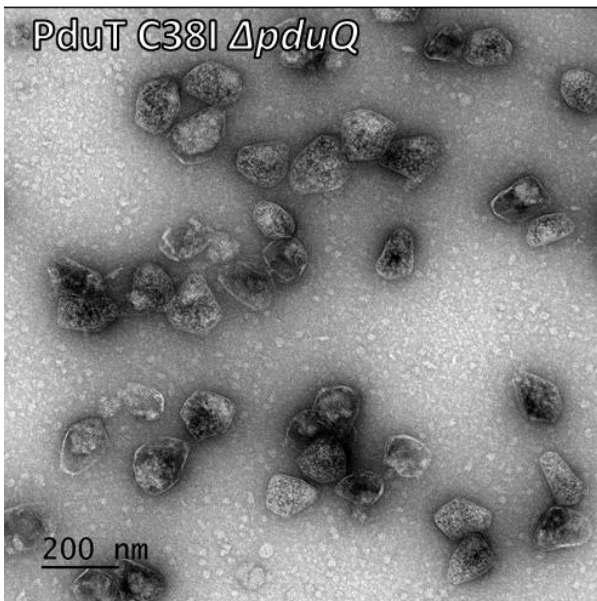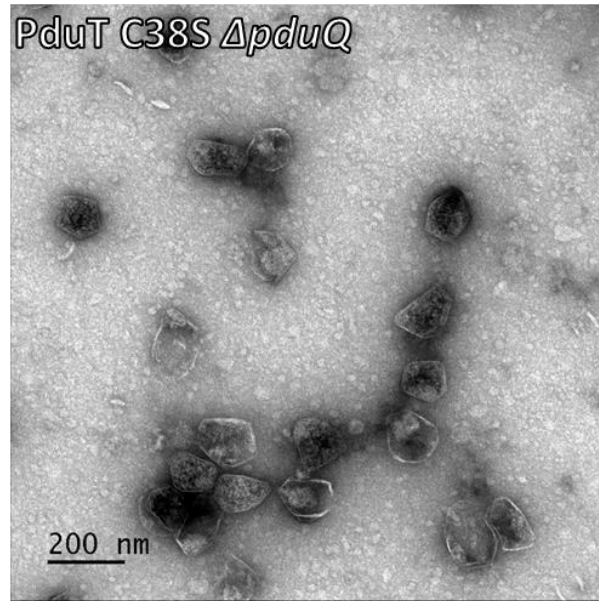

Supplement: mic-165-1355-s001.pdf [file mic-165-1355-s001.pdf]
